# Supplementary material for: “She’ll Be Right, Mate”: A Mixed Methods Analysis of Skin Cancer Prevention Practices among Australian Farmers—An At-Risk Group
Source: MDPI journal article supplement (doi:10.3390/ijerph19052940), 2022-03-03
Supplement: s1 [file s1]

# "She'll be right, mate": A mixed methods analysis of skin cancer prevention practices among Australian farmers – an at-risk group

## Supplementary Materials

Figure S1. Coding tree for barriers to prevention.

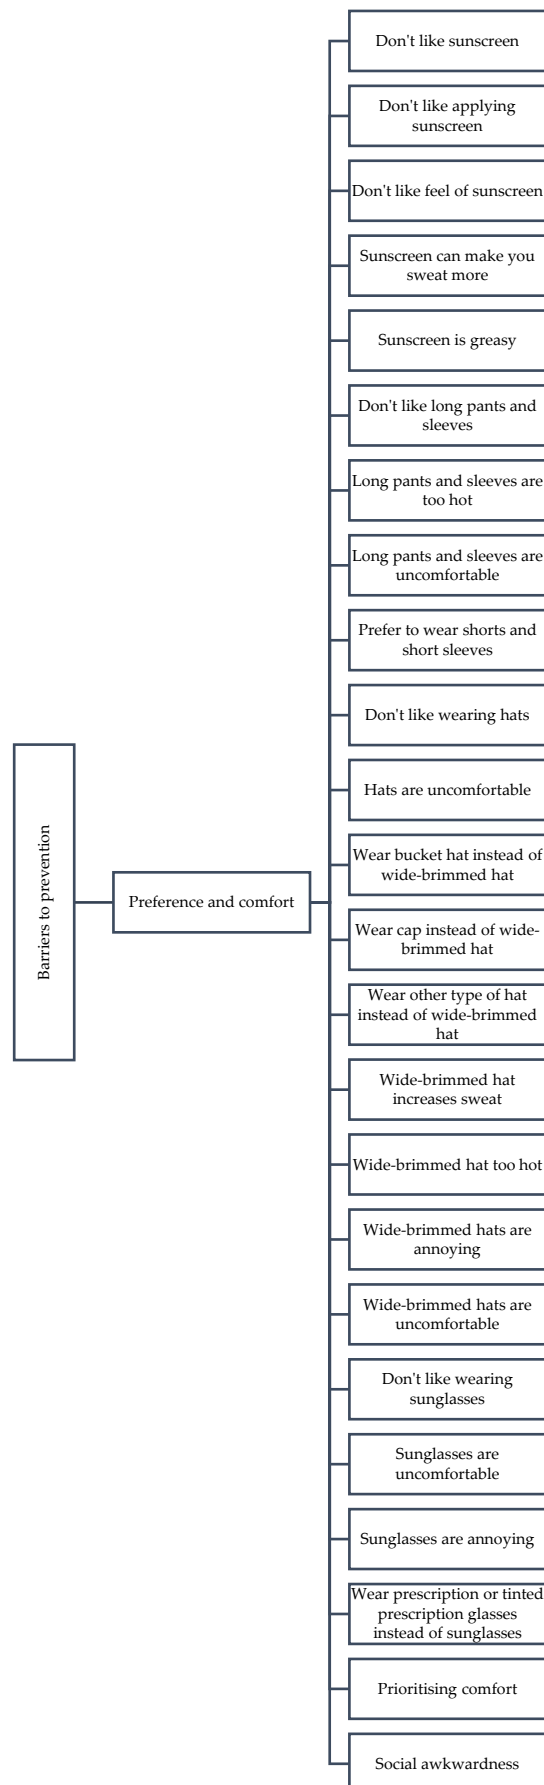

Figure S1. continued.

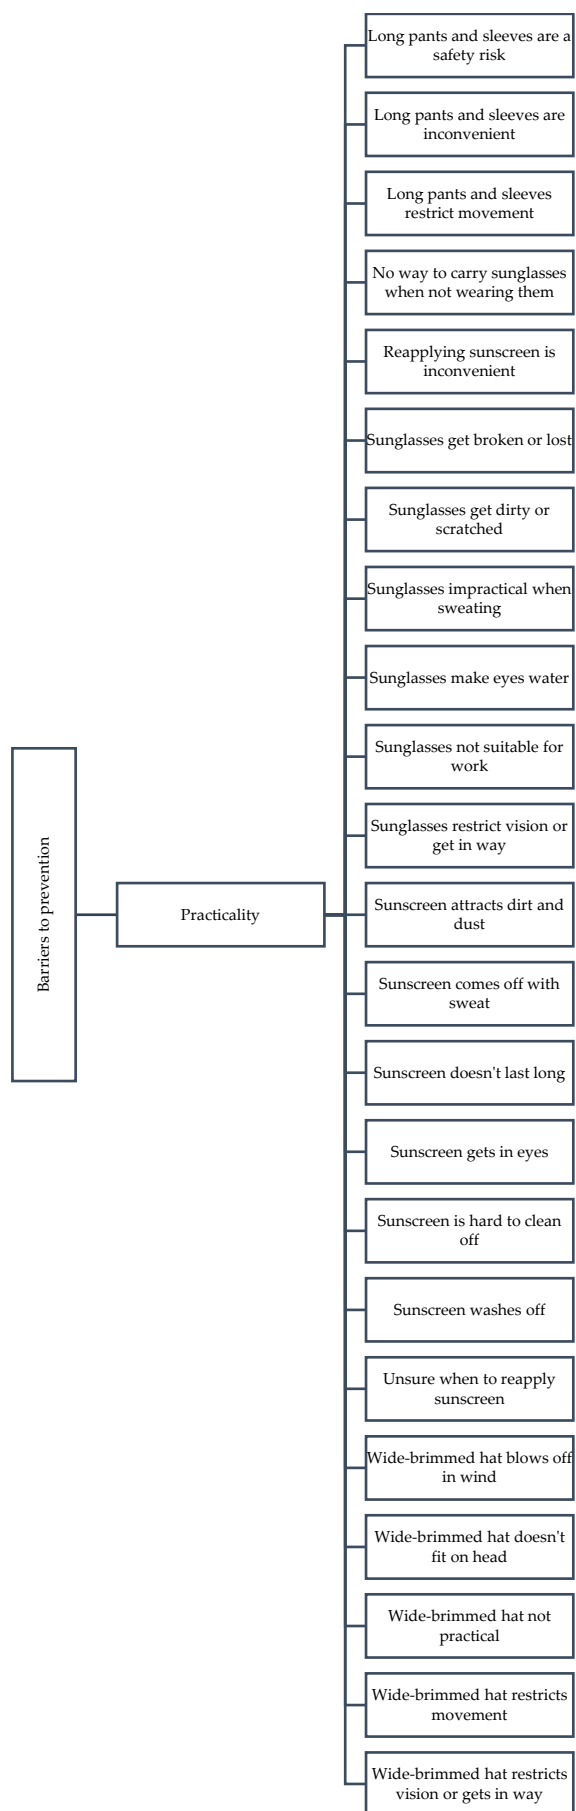

Figure S1. continued.

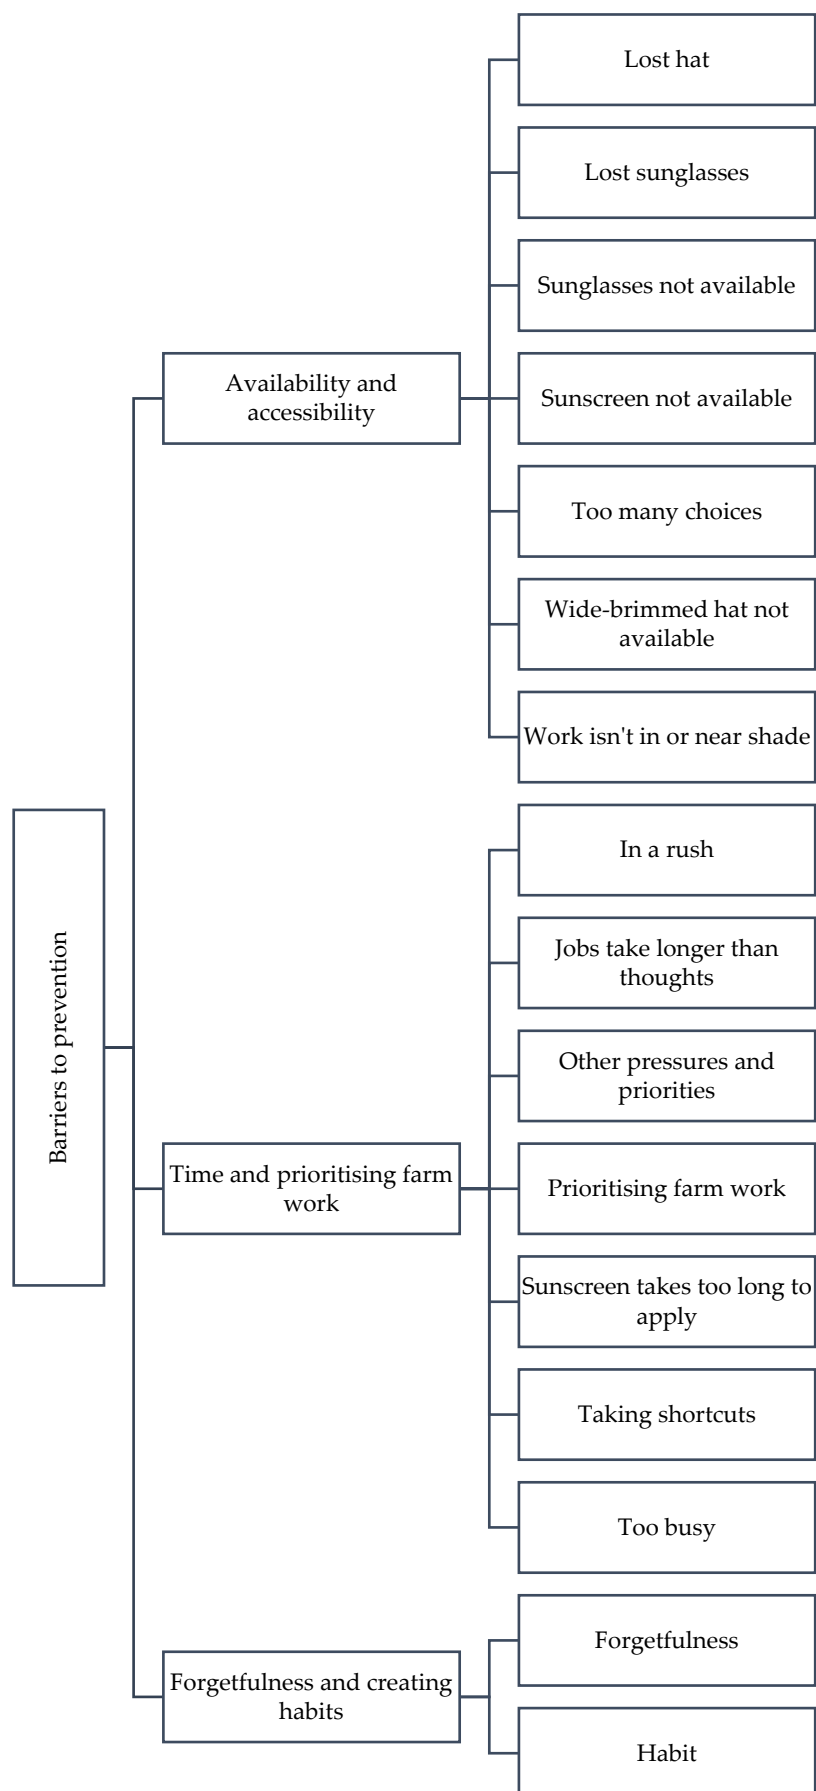

Figure S1. continued.

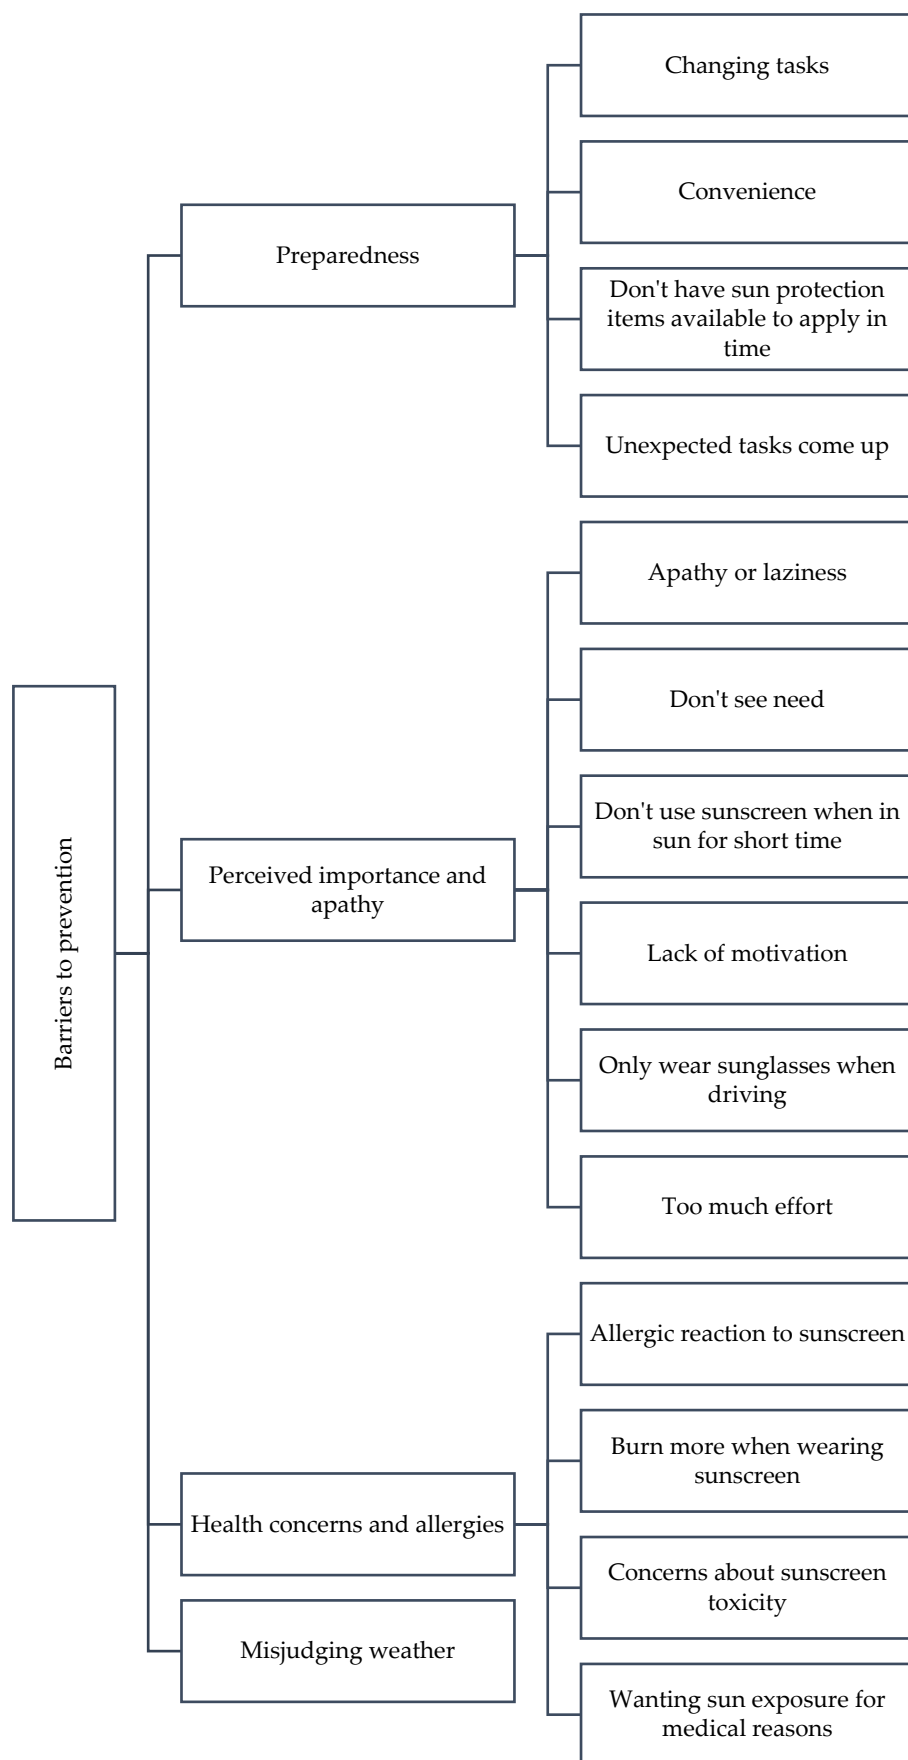

**Figure S2.** Coding tree for facilitators of prevention.

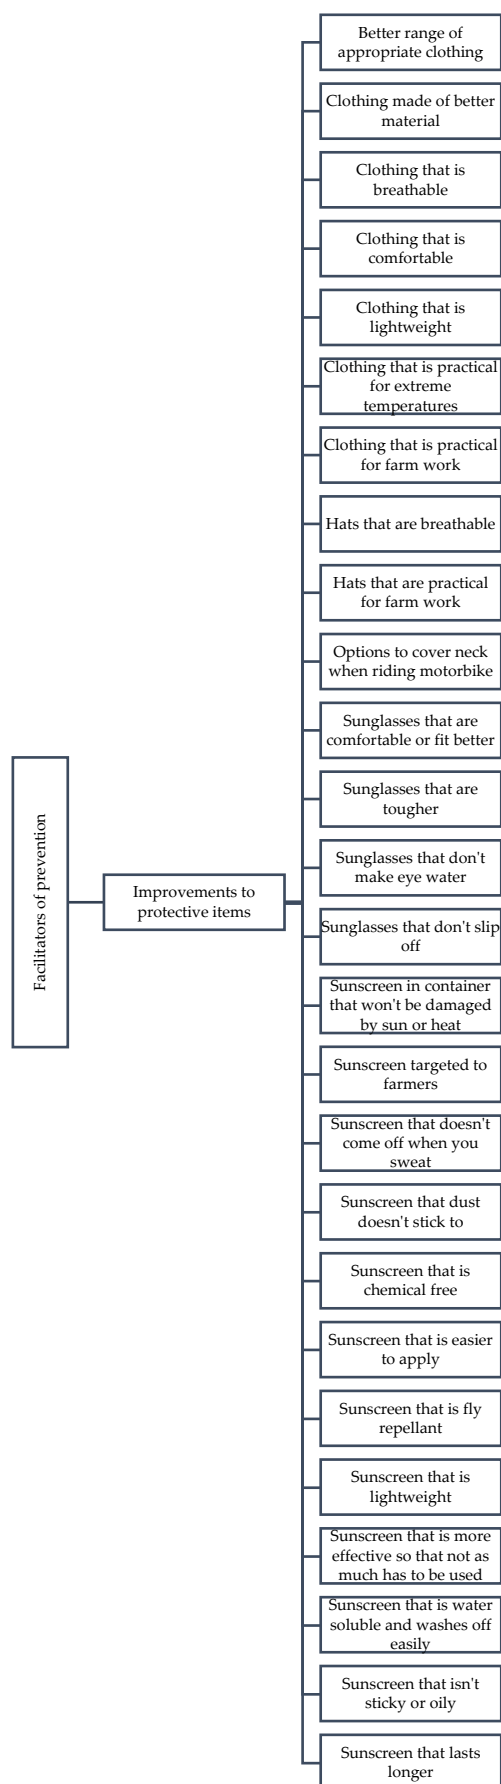

Figure S2. continued.

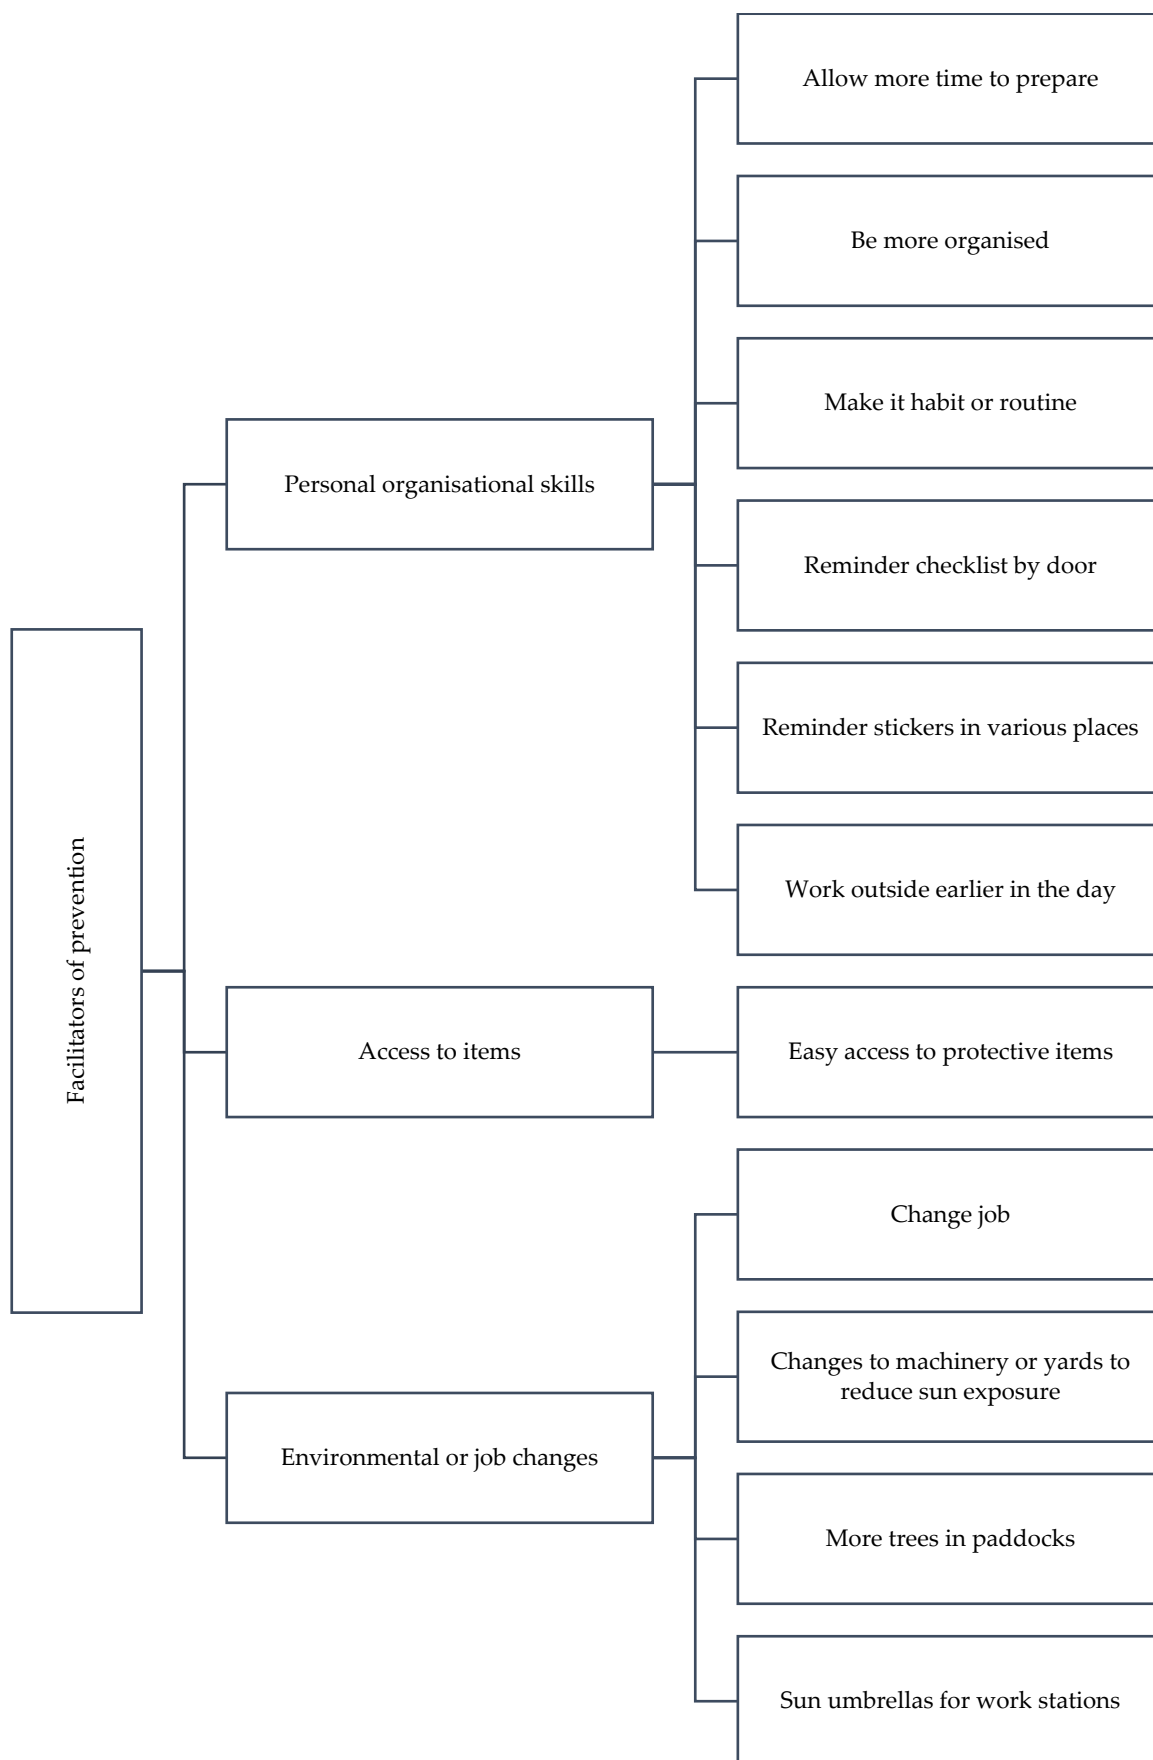

Figure S2. continued.

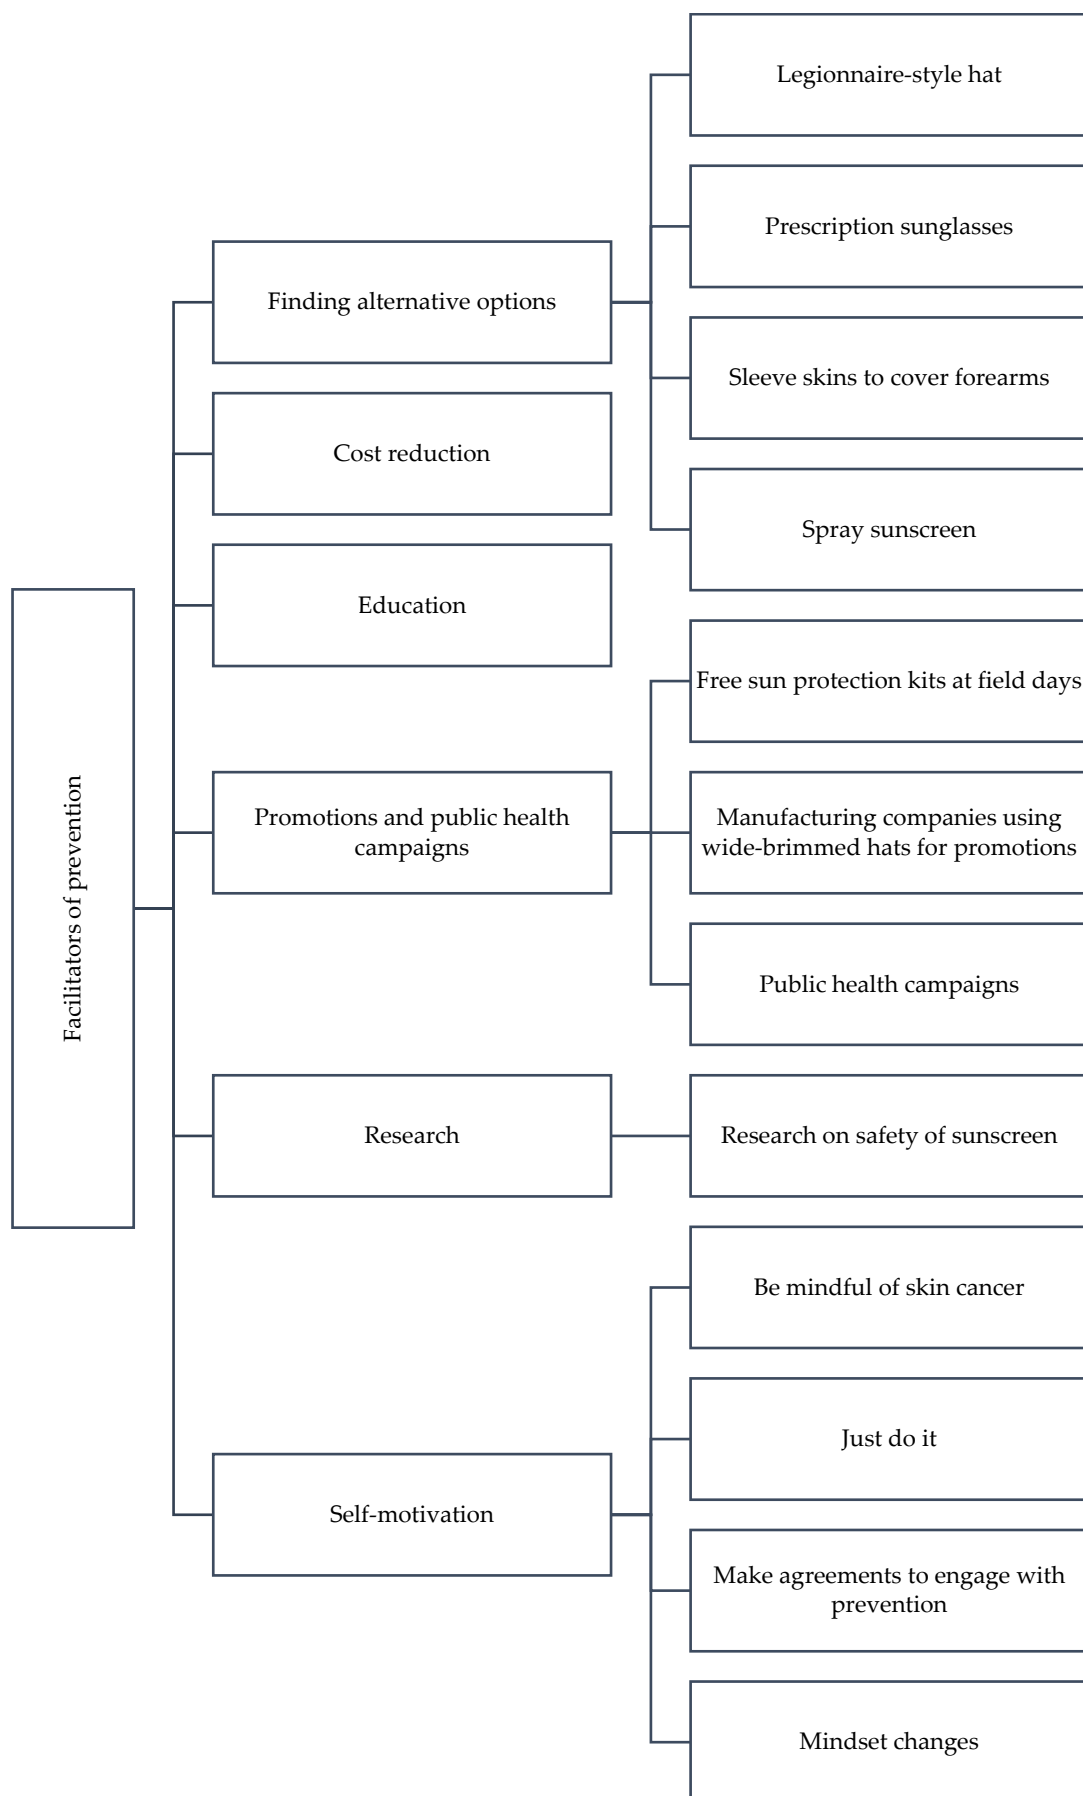

**Figure S3.** Coding tree for motivating factors for prevention

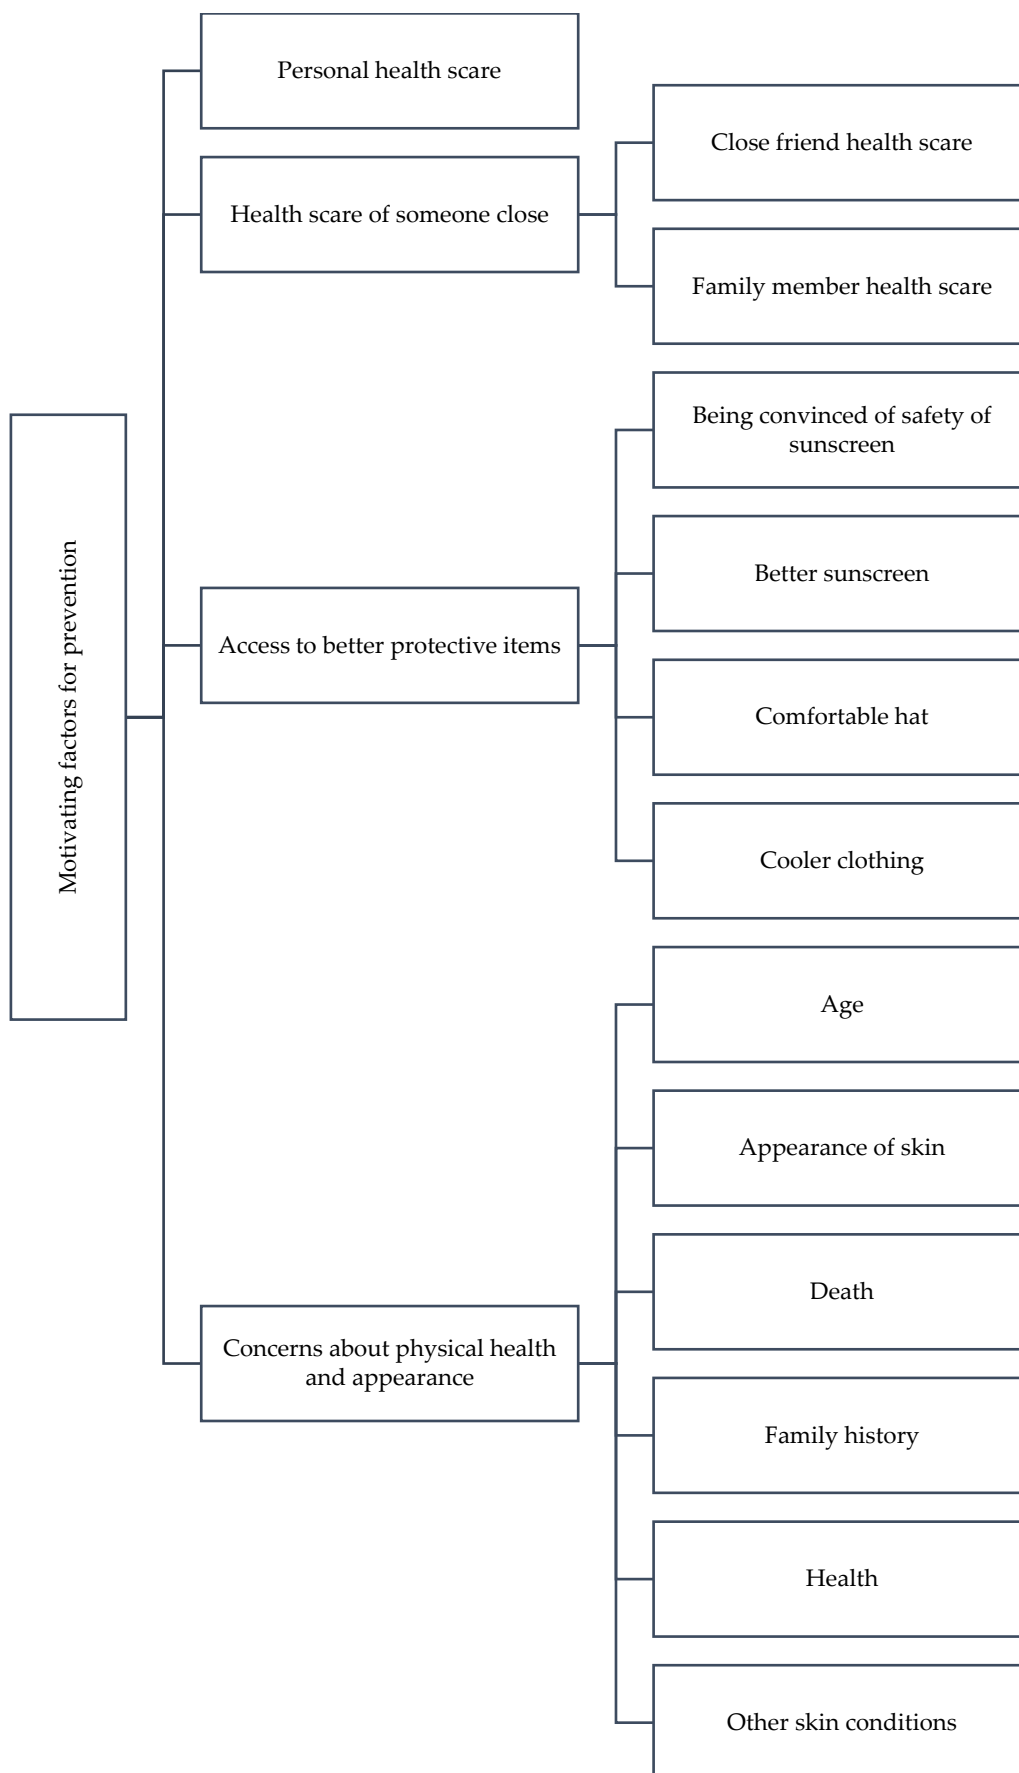



Figure S3. continued.

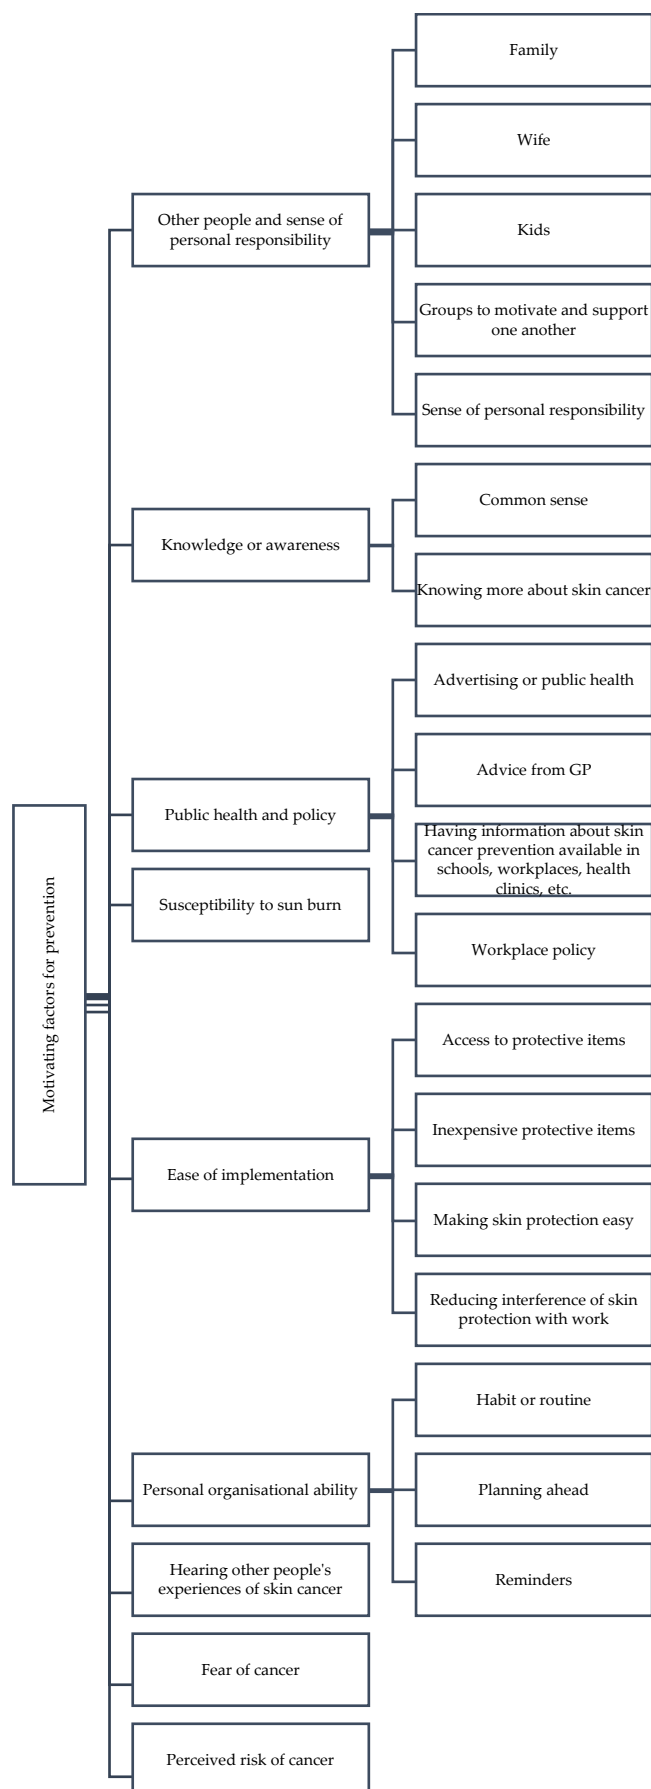

**Table S1.** Barriers to skin cancer prevention behaviours as reported by farmers.<sup>1</sup>

| Type of barrier                | n   | %    | Definition and representative quotes                                                                                                                                                                                                                                                                                                                                                                                                                                                                                                                                                                                                                                                                                                                                                                                                                                                                                                   |
|--------------------------------|-----|------|----------------------------------------------------------------------------------------------------------------------------------------------------------------------------------------------------------------------------------------------------------------------------------------------------------------------------------------------------------------------------------------------------------------------------------------------------------------------------------------------------------------------------------------------------------------------------------------------------------------------------------------------------------------------------------------------------------------------------------------------------------------------------------------------------------------------------------------------------------------------------------------------------------------------------------------|
| Preference and comfort         | 175 | 28.1 | <p>Barriers relating to personal preferences and comfort of sun-protective items.</p> <p><i>"It is often too hot in summer to wear long pants or a shirt with long sleeves"</i> (participant 160, male, 70-79 years)</p> <p><i>"Do not wear long pants – intolerable in heat"</i> (participant 62, male, 60-69 years)</p> <p><i>"Dislike greasy sunscreen, which to me makes natural perspiration more difficult"</i> (participant 122, male, 50-59 years)</p> <p><i>"I wear mostly a form of peak[ed] cap because wide-brim[med] hats make me sweat"</i> (participant 187, male, 50-59 years)</p> <p><i>"Sunglasses don't fit well over my normal glasses"</i> (participant 403, female, 50-59 years)</p>                                                                                                                                                                                                                             |
| Practicality                   | 169 | 27.1 | <p>Barriers relating to the practicality of sun-protective items for work on the farm.</p> <p><i>"Long sleeve shirts are difficult to work in, more dangerous with machinery and hotter to wear"</i> (participant 11, male, age not disclosed)</p> <p><i>"Wide-brimmed hats are useless on motorbikes. Better to wear a cap that you can wear 100% of the time."</i> (participant 237, male, 40-49 years)</p> <p><i>"Dust and dirt sticks to sunscreen and makes it uncomfortable"</i> (participant 208, male, 50-59 years)</p> <p><i>"I find sunscreen sticky and during harvest dust sticks to your face and arms"</i> (participant 483, male, 50-59 years)</p> <p><i>"Big floppy hats reduce visibility when feeding out hay in large groups of horses. Need to watch out for horses kicking at other horses, near me. So I wear a peaked cap which I realise is not as protective."</i> (participant 171, female, 60-69 years)</p> |
| Availability and accessibility | 116 | 18.6 | <p>Barriers relating to availability and accessibility of sun-protective items.</p> <p><i>"Don't always carry sunscreen, particularly when working on motorbike"</i> (participant 71, male, 50-59 years)</p>                                                                                                                                                                                                                                                                                                                                                                                                                                                                                                                                                                                                                                                                                                                           |

| Type of barrier                   | n  | %   | Definition and representative quotes                                                                                                                                                                                                                                                                                                                                                                                                                                                                                                 |
|-----------------------------------|----|-----|--------------------------------------------------------------------------------------------------------------------------------------------------------------------------------------------------------------------------------------------------------------------------------------------------------------------------------------------------------------------------------------------------------------------------------------------------------------------------------------------------------------------------------------|
|                                   |    |     | <p><i>"Not always possible to work in the shade depending on task, e.g. moving cattle, feeding cattle" (participant 224, female, 60-69 years)</i></p> <p><i>"Always being outside on the property – too far from house to reapply [sunscreen] or cover up" (participant 72, female, 50-59 years)</i></p> <p><i>"Hard to be in shade when your work isn't" (participant 351, male, 40-49 years)</i></p>                                                                                                                               |
| Time and prioritising farm work   | 43 | 6.9 | <p>Barriers relating to busyness and prioritizing farm work.</p> <p><i>"Farmers are constantly on the run at harvest time doing a lot of different jobs, so occasionally [skin cancer] prevention gets delayed" (participant 26, male, 50-59 years)</i></p> <p><i>"Always in a hurry" (participant 64, male, 40-49 years)</i></p>                                                                                                                                                                                                    |
| Forgetfulness and creating habits | 36 | 5.8 | <p>Barriers relating to forgetfulness or the need to create habits around use of sun-protective items.</p> <p><i>"I tend to forget to put on sunscreen, and if I remember it's usually when I feel my skin getting hot" (participant 417, female, 30-39 years)</i></p> <p><i>"Forgot to take sunscreen to reapply" (participant 150, female, 60-69 years)</i></p> <p><i>"Childhood habits – SunSmart didn't exist when I was a child. Trying to develop habit, but still need prodding" (participant 389, male, 60-69 years)</i></p> |
| Preparedness                      | 34 | 5.5 | <p>Barriers relating to being organized or prepared for changing tasks on the farm.</p> <p><i>"Not organised enough to have sunscreen available other than in farmhouse where it keeps better" (participant 268, male, 60-69 years)</i></p> <p><i>"Some unexpected stock problem arising which had to be fixed and no protection at hand" (participant 373, male, 70-79 years)</i></p>                                                                                                                                               |
| Perceived importance and apathy   | 23 | 3.7 | <p>Barriers relating to the perceived importance of, and apathy to, skin cancer prevention behaviours.</p> <p><i>"...can't be bothered taking the time to seek protection" (participant 459, male, 50-59 years)</i></p> <p><i>"...just lazy and need to get more organised" (participant 318, female, 50-59 years)</i></p>                                                                                                                                                                                                           |

| Type of barrier               | n  | %   | Definition and representative quotes                                                                                                                                                                                                                                                                                                                                                                                 |
|-------------------------------|----|-----|----------------------------------------------------------------------------------------------------------------------------------------------------------------------------------------------------------------------------------------------------------------------------------------------------------------------------------------------------------------------------------------------------------------------|
|                               |    |     | <p><i>"Old adage – she'll be right, mate" (participant 44, male, 60-69 years)</i></p> <p><i>"...just don't see the need" (participant 323, female, 70-79 years)</i></p> <p><i>"I don't burn so I don't use any protection" (participant 101, male, 30-39 years)</i></p> <p><i>"Applying sunscreen constantly was too much effort" (participant 481, male, 30-39 years)</i></p>                                       |
| Health concerns and allergies | 21 | 3.4 | <p>Barriers relating to health concerns or allergies to sunscreen.</p> <p><i>"Skin very sensitive to sunscreen" (participant 81, male, 50-59 years)</i></p> <p><i>"...daily application of sunscreen in the long term could cause health issues in itself" (participant 321, male, 60-69 years)</i></p> <p><i>"...worry a little about the chemicals in sunscreen..." (participant 134, female, 40-49 years)</i></p> |
| Misjudging weather            | 6  | 0.9 | <p>Barriers relating to misjudging the weather or UV intensity.</p> <p><i>"Sometimes I misjudge the intensity of the sun, even on cooler days" (participant 459, male, 50-59 years)</i></p> <p><i>"Changes in cloud cover / sun intensity" (participant 130, male, 60-69 years)</i></p>                                                                                                                              |

<sup>1</sup> Responses to open-ended question: "What made performing one or more of the skin cancer prevention behaviours outlined above difficult for you last summer?"

**Table S2.** Facilitators of skin cancer prevention behaviours as reported by farmers.<sup>2</sup>

| Type of facilitator              | n   | %    | Definition and representative quotes                                                                                                                                                                                                                                                                                                                                                                                                                                                                                                              |
|----------------------------------|-----|------|---------------------------------------------------------------------------------------------------------------------------------------------------------------------------------------------------------------------------------------------------------------------------------------------------------------------------------------------------------------------------------------------------------------------------------------------------------------------------------------------------------------------------------------------------|
| Improvements to protective items | 139 | 50.7 | <p>Facilitators relating to making improvements to sun-protective items to be better-suited to farm work.</p> <p><i>"Suitably designed sun protective work [clothes] that [are] light and comfortable to wear in the warmest of weather."</i> (participant 37, male, 50-59 years)</p> <p><i>"Make sunscreen easier to apply and less oily, with a build-in insect repellent."</i> (participant 264, gender not disclosed, 40-49 years)</p> <p><i>"Cooler and less uncomfortable protective clothing"</i> (participant 228, male, 60-69 years)</p> |
| Personal organisational skills   | 31  | 11.3 | <p>Facilitators relating to being better organised.</p> <p><i>"It's actually not that hard, just a matter of getting into the habit of performing said practices."</i> (participant 354, male, 40-49 years)</p> <p><i>"Work earlier and later in the day. Try to avoid noon 'til 4PM."</i> (participant 200, male, 60-69 years)</p> <p><i>"Putting reminder stickers on iPads, ute windscreens, diaries, etc."</i> (participant 435, female, 60-69 years)</p>                                                                                     |
| Access to items                  | 30  | 10.9 | <p>Facilitators relating to having access to sun-protective items.</p> <p><i>"Have a stockpile of sunscreen in Eski to keep cool in car and purchase many wide-brimmed hats [with] ventilation"</i> (participant 377, male, 50-59 years)</p> <p><i>"Carry sunscreen in my lunchbox and apply to my hands and face during each break – make this a 'habit' on high UV days!"</i> (participant 272, male, 50-59 years)</p> <p><i>"Have sunscreen, hat, and glasses at back door as you leave home"</i> (participant 192, male, 60-69 years)</p>     |
| Environmental or job changes     | 20  | 7.3  | <p>Facilitators relating to making changes to the work environment.</p> <p><i>"Probably the best way for me to see less sun is to build a cover over the sheep yards"</i> (participant 164, gender not disclosed, 50-59 years)</p> <p><i>"By planting more trees ... to provide more shade for myself and the cattle"</i> (participant 160, male, 70-79 years)</p>                                                                                                                                                                                |

| Type of facilitator                    | n  | %   | Definition and representative quotes                                                                                                                                                                                                                                                                                                                                                                                                                                                                                                                                                                                                                                                                                                                                                                          |
|----------------------------------------|----|-----|---------------------------------------------------------------------------------------------------------------------------------------------------------------------------------------------------------------------------------------------------------------------------------------------------------------------------------------------------------------------------------------------------------------------------------------------------------------------------------------------------------------------------------------------------------------------------------------------------------------------------------------------------------------------------------------------------------------------------------------------------------------------------------------------------------------|
|                                        |    |     | <i>"Sturdy sun umbrellas for workstations" (participant 369, male, 60-69 years)</i>                                                                                                                                                                                                                                                                                                                                                                                                                                                                                                                                                                                                                                                                                                                           |
| Finding alternative options            | 19 | 6.9 | Facilitators relating to finding alternative sun-protective items that are better-suited to farm work.<br><br><i>"Spray sunscreens make it easier to reapply when your hands and skin are dirty and sweaty" (participant 158, female, 30-39 years)</i><br><br><i>"Prescription sunglasses" (participant 228, male, 60-69 years)</i><br><br><i>"Sleeve-like skins to cover forearms rather than loose sleeves" (participant 221, male, 30-39 years)</i>                                                                                                                                                                                                                                                                                                                                                        |
| Cost reduction                         | 11 | 4.0 | Facilitators relating to reducing the cost of sun-protective items.<br><br><i>"Access to a range of clothing suited to hot, dusty work that is easy to wear and reasonably fashionable, without spending a fortune." (participant 388, male, 50-59 years)</i><br><br><i>"Make quality sunglasses more affordable" (participant 54, gender not disclosed, 50-59 years)</i>                                                                                                                                                                                                                                                                                                                                                                                                                                     |
| Education                              | 9  | 3.3 | Facilitators relating to educating farmers about skin cancer prevention.<br><br><i>"Must retrain the dog. Easy to train a puppy not so for the dog." (participant 389, male, 60-69 years)</i><br><br><i>"Educate the young – didn't happen when I was young – big sunburn every summer." (participant 440, male, 80-89 years)</i>                                                                                                                                                                                                                                                                                                                                                                                                                                                                             |
| Promotions and public health campaigns | 7  | 2.6 | Facilitators relating to promoting skin cancer prevention and running public health campaigns.<br><br><i>"Industry manufacturers supplies often provide free caps. I have never seen any free wide-brimmed hats, which could still have company logo." (participant 162, male, 60-69 years)</i><br><br><i>"Many farmers I see wear caps rather than [wide-brimmed hats]. Most of these caps have brand names and would be promotional. A greater use of [wide-brimmed hats] by companies would help change what people wear." (participant 430, male, 50-59 years)</i><br><br><i>"...maybe more surveys or [skin cancer] prevention kits could be given out at Field Days or local shows." (participant 187, male, 50-59 years)</i><br><br><i>"Advertising programs" (participant 490, male, 70-79 years)</i> |

| Type of facilitator | n | %   | Definition and representative quotes                                                                                                                                                                                                                                                                                               |
|---------------------|---|-----|------------------------------------------------------------------------------------------------------------------------------------------------------------------------------------------------------------------------------------------------------------------------------------------------------------------------------------|
|                     |   |     | <i>"Advising public of skin cancer statistics, especially fatalities" (participant 490, male, 70-79 years)</i>                                                                                                                                                                                                                     |
| Research            | 4 | 1.5 | Facilitators relating to research into the safety of sunscreen.<br><br><i>"Determine and publish risks associated with wearing sunscreen" (participant 349, male 70-79 years)</i><br><br><i>"It would be easier to use sunscreen if it was known to be absolutely safe to use repeatedly" (participant 218, male, 70-79 years)</i> |
| Self-motivation     | 4 | 1.5 | Facilitators relating to self-motivation.<br><br><i>"Firmly resolve to take all listed behaviours" (participant 65, male, 40-49 years)</i><br><br><i>"A change of mindset on the discomfort of sweating in long sleeves and pants over the benefits gained" (participant 239, male, 70-79 years)</i>                               |

---

<sup>2</sup>Responses to open-ended question: "How could the skin cancer prevention behaviours listed above be made easier to perform?"

**Table S3.** Motivating factors for skin cancer prevention behaviours as reported by farmers.<sup>3</sup>

| Type of motivating factor                     | n   | %    | Definition and representative quotes                                                                                                                                                                                                                                                                                                                                                                                                                                                                                                                                                                                                                                                       |
|-----------------------------------------------|-----|------|--------------------------------------------------------------------------------------------------------------------------------------------------------------------------------------------------------------------------------------------------------------------------------------------------------------------------------------------------------------------------------------------------------------------------------------------------------------------------------------------------------------------------------------------------------------------------------------------------------------------------------------------------------------------------------------------|
| Personal health scare                         | 113 | 35.9 | <p>Motivating factors relating to a personal health scare.</p> <p><i>"A positive diagnosis would get me thinking that I should know better"</i><br/>(participant 109, male, 50-59 years)</p> <p><i>"Getting a touch of it would sharpen my behaviour up"</i> (participant 103, male, 40-49 years)</p>                                                                                                                                                                                                                                                                                                                                                                                      |
| Health scare of someone close                 | 54  | 17.2 | <p>Motivating factors relating to a health scare of a family member, friend, or colleague.</p> <p><i>"I have not had any close friends or relatives with a bad melanoma experience. Perhaps if I did, I would be more careful."</i> (participant 180, male, 50-59 years)</p> <p><i>"Probably if someone close to me was diagnosed with skin cancer and was following the same preventative practices that I am (would then have to question to effectiveness of my prevention strategies)."</i> (participant 327, male, 40-49 years)</p>                                                                                                                                                   |
| Access to better protective items             | 25  | 7.9  | <p>Motivating factors relating to access to better sun-protective items.</p> <p><i>"More suitable sunscreen products"</i> (participant 35, male, 60-69 years)</p> <p><i>"Cooler clothing and more practical hat"</i> (participant 16, male, 60-69 years)</p>                                                                                                                                                                                                                                                                                                                                                                                                                               |
| Concerns about physical health and appearance | 22  | 7.0  | <p>Motivating factors relating to physical health (e.g., age) or appearance (e.g., appearance of sun damage).</p> <p><i>"I really know I should, I should make it all routine to put on sunscreen every day. I look at my skin and feel my hands and neck are looking aged because of being outdoors all the time, this should be enough, but I guess it's not."</i><br/>(participant 417, female, 30-39 years)</p> <p><i>"Making me look a lot older than I am. This was evident to me at a class reunion where I saw classmates after 30 years. The ones with office jobs had a lot better skin than me, and I looked more weather beaten."</i> (participant 260, male, 50-59 years)</p> |
| Other people and personal responsibility      | 20  | 6.4  | <p>Motivating factors relating to other people (family, spouse, kids) and a sense of personal responsibility.</p> <p><i>"My wife's nagging"</i> (participant 410, male, 50-59 years)</p>                                                                                                                                                                                                                                                                                                                                                                                                                                                                                                   |



| Type of motivating factor  | n  | %   | Definition and representative quotes                                                                                                                                                                                                                                                                                                                                                                                                                                                                                                                                                                                                                                                                                |
|----------------------------|----|-----|---------------------------------------------------------------------------------------------------------------------------------------------------------------------------------------------------------------------------------------------------------------------------------------------------------------------------------------------------------------------------------------------------------------------------------------------------------------------------------------------------------------------------------------------------------------------------------------------------------------------------------------------------------------------------------------------------------------------|
|                            |    |     | <p><i>"A better sense of personal responsibility to the risks and grief it would cause myself and my family" (participant 355, male, 60-69 years)</i></p> <p><i>"Being a good example to staff and family and leading by always wearing PPE in summer heat." (participant 139, male, 50-59 years)</i></p>                                                                                                                                                                                                                                                                                                                                                                                                           |
| Knowledge or awareness     | 17 | 5.4 | <p>Motivating factors relating to knowledge or awareness of skin cancer and skin cancer prevention behaviours.</p> <p><i>"Knowledge about the reality of skin cancer and its devastating effects" (participant 382, female, 60-69 years)</i></p> <p><i>"Understanding the repercussions of not preventing it" (participant 363, male, 60-69 years)</i></p>                                                                                                                                                                                                                                                                                                                                                          |
| Public health and policy   | 16 | 5.1 | <p>Motivating factors relating to public health advice and workplace policy.</p> <p><i>"...a little flyer through the post every few years would be enough to 'alert' me. In particular, the benefits of sunscreen." (participant 272, male, 50-59 years)</i></p> <p><i>"...seeking the advice of a doctor." (participant 475, male, 80-89 years)</i></p> <p><i>"I have seen self-help check sheets. [Distribute at] silos, hotels, health centres, CFS, SES, IT centres, schools, merchandise agents (Elders), Field Days, Post [Office]..." (participant 206, male, 70-79 years)</i></p> <p><i>"Push that skin cancer is an OHS issue, same as breathing chemicals." (participant 430, male, 50-59 years)</i></p> |
| Susceptibility to sun burn | 12 | 3.8 | <p>Motivating factors relating to personal susceptibility to sun burn.</p> <p><i>"Knowing my skin type puts me at greater risk of sun damage and skin cancer" (participant 60, male, 60-69 years)</i></p> <p><i>"Being susceptible to sun burn" (participant 8, male, 50-59 years)</i></p>                                                                                                                                                                                                                                                                                                                                                                                                                          |
| Ease of implementation     | 8  | 2.6 | <p>Motivating factors relating to the ease of implementing skin cancer prevention behaviours.</p> <p><i>"If it was easy and worked with my work practices" (participant 325, male, 30-39 years)</i></p>                                                                                                                                                                                                                                                                                                                                                                                                                                                                                                             |

| Type of motivating factor                         | n | %   | Definition and representative quotes                                                                                         |
|---------------------------------------------------|---|-----|------------------------------------------------------------------------------------------------------------------------------|
|                                                   |   |     | <i>"Finding the correct attire easily and not too expensive" (participant 388, male, 50-59 years)</i>                        |
|                                                   |   |     | <i>"Having the hat and sunscreen available" (participant 303, female, 40-49 years)</i>                                       |
|                                                   |   |     | <i>"Making it easy" (participant 163, male, 50-59 years)</i>                                                                 |
| Personal organisational ability                   | 8 | 2.6 | Motivating factors relating to being better organised (e.g., creating habits, planning ahead, having reminders, etc.).       |
|                                                   |   |     | <i>"Incorporation into daily routine" (participant 425, female, 40-49 years)</i>                                             |
|                                                   |   |     | <i>"Plan[ning] ahead" (participant 18, male, 50-59 years)</i>                                                                |
| Hearing other people's experiences of skin cancer | 7 | 2.2 | Motivating factors relating to hearing other people's experiences of skin cancer.                                            |
|                                                   |   |     | <i>"Hearing from and seeing people who have gone through the trauma of skin cancer" (participant 249, male, 40-49 years)</i> |
|                                                   |   |     | <i>"Seeing images and results of cancer" (participant 29, male, 50-59 years)</i>                                             |
|                                                   |   |     | <i>"Someone my age getting affected by skin cancer due to UV exposure" (participant 448, male, 30-39 years)</i>              |
| Fear of cancer                                    | 6 | 1.9 | Motivating factors relating to fear of cancer.                                                                               |
|                                                   |   |     | <i>"Fear of skin cancer and its consequences motivate me" (participant 37, male, 50-59 years)</i>                            |
|                                                   |   |     | <i>"The fear of getting a serious malignant melanoma" (participant 123, male, 50-59 years)</i>                               |
| Perceived risk of cancer                          | 6 | 1.9 | Motivating factors relating to the perceived risk of skin cancer.                                                            |
|                                                   |   |     | <i>"My own perceived risk to an occurrence [of skin cancer]" (participant 379, male, 60-69 years)</i>                        |
|                                                   |   |     | <i>"Statistics on workers in our industry" (participant 322, male, 40-49 years)</i>                                          |

<sup>3</sup>Responses to open-ended question: "What would motivate you to make preventing skin cancer a priority?"
